# Supplementary material for: Genetic Dissection of Extreme Seed-Flooding Tolerance in a Wild Soybean PI342618B by Linkage Mapping and Candidate Gene Analysis
Source: MDPI journal article supplement (doi:10.3390/plants12122266), 2023-06-10
Supplement: s1 [file s1]

Supplementary Table S1  
Primers used in this study

| Gene                            | Forward (5'-3')                              | Reverse (5'-3')                              | Purpose                     |
|---------------------------------|----------------------------------------------|----------------------------------------------|-----------------------------|
| <i>CHS1-Glyma.08G109400</i> cds | ATGGTGAGTGTTGAAGAGATTC                       | TCAGAGAGTGACACTGCGGAGC                       | gene cloning                |
| <i>CHS3-Glyma.08G109300</i> cds | ATGGTCAGTGTTGAAGAGATCCGTA                    | TTAGACAGTGACACTGCGGAGCACA                    | gene cloning                |
| <i>CHS4-Glyma.08G110700</i> cds | ATGGTGAGTGTTGAAGAGATTCGTA                    | TTAGACAGTGACACTGCGGAGTACA                    | gene cloning                |
| <i>Glyma.08g122400</i> cds      | ATGAATGCTAGAAAGCTGGCA                        | CTAGATGTAATTTGCTAGTTGA                       | gene cloning                |
| <i>Glyma.08g125100</i> cds      | ATGGAGGTGACCAACCTTGT                         | CTAGAAATGGGAAGGATGGA                         | gene cloning                |
| <i>Glyma.08G137600</i> cds      | ATGGGAAGTCTATAGACATGT                        | TCATATAGCTTCCCAATCAATC                       | gene cloning                |
| <i>Glyma.08g145300</i> cds      | ATGATGAAGAACGATAGAGA                         | TCAGGCAGAAGAAGAGGAGC                         | gene cloning                |
| <i>Glyma.08G149200</i> cds      | ATGGCAGAGTCTCAGAAACAAC                       | TTAGGCATAATGTATATTGAGGGG                     | gene cloning                |
| qPCR- <i>Glyma.08g125600</i>    | CGCATGCAAGAAATAGGTTC                         | TGTAATTGACTGCACACATT                         | qRT-PCR expression analysis |
| qPCR- <i>Glyma.08g119500</i>    | TGGTGCATTTTCAGAACTCA                         | TCACGTTTATCTGATACCCT                         | qRT-PCR expression analysis |
| qPCR- <i>Glyma.08g119600</i>    | AACTTAACTCACAGCTCGTA                         | GGGTATCAAAGTTTGAGATT                         | qRT-PCR expression analysis |
| qPCR- <i>Glyma.08g122400</i>    | ATAATCCGAACACTGTCCGC                         | GTTGGTGGTGGCTGATTAGT                         | qRT-PCR expression analysis |
| qPCR- <i>Glyma.08g125000</i>    | TTCCTGGAACAAGGTTTCAT                         | CATTTTCGGTCATAAACCTTC                        | qRT-PCR expression analysis |
| qPCR- <i>Glyma.08g125100</i>    | CTCAGAACTACTTGCCAAA                          | AAATTTTAAGGAAAGCTTTG                         | qRT-PCR expression analysis |
| qPCR- <i>Glyma.08g128600</i>    | CAGAAAGTTTGAGGACTTGT                         | ATTGGCATGTGGCTGAAATT                         | qRT-PCR expression analysis |
| qPCR- <i>Glyma.08g145300</i>    | TCATGGTGGCAACTCTGTTCTC                       | CTCCTCGCTTCTTCTCCTCCT                        | qRT-PCR expression analysis |
| qPCR- <i>Glyma.08G137600</i>    | TCTAAGACACCACGAGCCTTC                        | TTTGCCACGTCAGACTCGACCT                       | qRT-PCR expression analysis |
| qPCR- <i>Glyma.08G149200</i>    | TTGGAGAGGATTGAGAACCCGA                       | CCCATTTTCTCTGCCTAACACC                       | qRT-PCR expression analysis |
| qRT- <i>Actin11</i>             | ATGACCCAAATCATGTTTGAGACC                     | TCAGTTAGATCACGACCAGCGA                       | qRT-PCR expression analysis |
| <i>GmSFT1(Glyma.08G137600)</i>  | AGCCACCATGCTCGAGATGGGAAC<br>TGCTATAGACATGTAC | TGCTCACCATCTCGAGTATAGCTTC<br>CCAATCAATCTCCAC | vector construction         |

Table S2

ANOVA of GR, NSR and EC in two RIL populations.

| Population | Trait | Source    | DF <sup>a</sup> | MS <sup>b</sup> | F <sup>c</sup> |
|------------|-------|-----------|-----------------|-----------------|----------------|
| NJRINP     | GR    | Genotype  | 280             | 0.37            | 2.43***        |
|            |       | Env       | 1               | 1.87            | 12.32***       |
|            |       | Block     | 1               | 0.00            | 0.00           |
|            |       | Gen × Env | 265             | 0.17            | 1.09**         |
|            |       | Error     | 485             | 0.15            |                |
|            | NSR   | Genotype  | 280             | 0.17            | 12.05***       |
|            |       | Env       | 1               | 46.23           | 3300.74***     |
|            |       | Block     | 1               | 0.07            | 4.83           |
|            |       | Gen × Env | 264             | 0.13            | 9.29***        |
|            |       | Error     | 482             | 0.01            |                |
|            | EC    | Genotype  | 280             | 131017.63       | 23.36***       |
|            |       | Env       | 1               | 139454.82       | 24.87***       |
|            |       | Block     | 1               | 23624.23        | 4.21           |
|            |       | Gen × Env | 269             | 13471.06        | 2.4**          |
|            |       | Error     | 541             | 5607.53         |                |
| NJRI4P     | GR    | Genotype  | 160             | 0.43            | 9.08***        |
|            |       | Env       | 1               | 0.64            | 13.34***       |
|            |       | Block     | 1               | 0.00            | 0.00           |
|            |       | Gen × Env | 159             | 0.10            | 2.01**         |
|            |       | Error     | 302             | 0.05            |                |
|            | NSR   | Genotype  | 160             | 0.44            | 11.23***       |
|            |       | Env       | 1               | 0.29            | 7.26**         |
|            |       | Block     | 1               | 0.00            | 0.01           |
|            |       | Gen × Env | 158             | 0.09            | 2.37**         |
|            |       | Error     | 282             | 0.04            |                |
|            | EC    | Genotype  | 160             | 185786.52       | 8.69***        |
|            |       | Env       | 1               | 137737.31       | 6.44**         |
|            |       | Block     | 1               | 15016.54        | 0.70           |
|            |       | Gen × Env | 159             | 37284.26        | 1.74**         |
|            |       | Error     | 312             | 21388.16        |                |

\*\*\*  $p < 0.001$ ; \*\*  $p < 0.01$ . <sup>a</sup> Degrees of freedom. <sup>b</sup> Mean square. <sup>c</sup>  $F$  value is for determining significance.

Table S3

Analysis of nucleotide mutation position of *CHS1*, *CHS3* and *CHS4*.

| Gene        | Position(bp) | Nucleotide variation | Amino acid variation |                |
|-------------|--------------|----------------------|----------------------|----------------|
|             |              |                      | Variation way        | Variation type |
| <i>CHS1</i> | 396          | T/C                  | -                    | S              |
|             | 498          | C/T                  |                      |                |
|             | 531          | C/T                  |                      |                |
| <i>CHS3</i> | 219          | T/C                  |                      |                |
|             | 225          | A/G                  |                      |                |
|             | 243          | G/C                  |                      |                |
|             | 255          | T/A                  |                      |                |
|             | 258          | C/T                  |                      |                |
| <i>CHS4</i> | 531          | C/T                  |                      |                |

x/y = x nucleotide change into y nucleotide, - = No variation, S = Synonymous mutations, N = Non-synonymous mutations.



Table S4

Functional annotation of 10 candidate genes associated with seed-flooding tolerance located in the QTL hotspots on Chr.08.

| Gene                   | Function annotation                                       |
|------------------------|-----------------------------------------------------------|
| <i>Glyma.08g119500</i> | FASCICLIN-like arabinogalactan-protein 12                 |
| <i>Glyma.08g119600</i> | FASCICLIN-like arabinogalactan-protein 11                 |
| <i>Glyma.08g122400</i> | Carbohydrate-binding X8 domain superfamily protein        |
| <i>Glyma.08g125000</i> | Cytochrome P450, family 716, subfamily A, polypeptide 1   |
| <i>Glyma.08g125100</i> | Cytochrome P450, family 716, subfamily A, polypeptide 1   |
| <i>Glyma.08g125600</i> | UDP-glycosyltransferase 74 F1                             |
| <i>Glyma.08g128600</i> | Cytochrome P450, family 716, subfamily A, polypeptide 1   |
| <i>Glyma.08G137600</i> | Ethylene response factor/AP2 domain                       |
| <i>Glyma.08g145300</i> | Integrase-type DNA-binding superfamily protein/AP2 domain |
| <i>Glyma.08G149200</i> | Integrase-type DNA-binding superfamily protein/AP2 domain |

A

|         |                                                                                                                                           |      |
|---------|-------------------------------------------------------------------------------------------------------------------------------------------|------|
| P1-CHS1 | ATGGTGAGTGTGAAGAGATTGTAAGCGCAACGTCAGAAAGGCCCTGCCACTGTCATGGCTATTGGCACGCGCACTCTCCCAACTGGGTGGATCAGAGTAACCTATCTGACTATTATTCCCGATCACCACACGGA    | 140  |
| P2-CHS1 | ATGGTGAGTGTGAAGAGATTGTAAGCGCAACGTCAGAAAGGCCCTGCCACTGTCATGGCTATTGGCACGCGCACTCTCCCAACTGGGTGGATCAGAGTAACCTATCTGACTATTATTCCCGATCACCACACGGA    | 140  |
| P3-CHS1 | ATGGTGAGTGTGAAGAGATTGTAAGCGCAACGTCAGAAAGGCCCTGCCACTGTCATGGCTATTGGCACGCGCACTCTCCCAACTGGGTGGATCAGAGTAACCTATCTGACTATTATTCCCGATCACCACACGGA    | 140  |
| P1-CHS1 | GCACATGACCGAGCTCAAAGAAAAATTCAAGCGCATGTGTGATAAGTCAGTAAAGAGCGATACATGACTTAAAGAGAGATCCTGAAAGAGAAATCCGAGTGTGTTGCTGTACATGGCACCTTCGTTGGATGCAA    | 280  |
| P2-CHS1 | GCACATGACCGAGCTCAAAGAAAAATTCAAGCGCATGTGTGATAAGTCAGTAAAGAGCGATACATGACTTAAAGAGAGATCCTGAAAGAGAAATCCGAGTGTGTTGCTGTACATGGCACCTTCGTTGGATGCAA    | 280  |
| P3-CHS1 | GCACATGACCGAGCTCAAAGAAAAATTCAAGCGCATGTGTGATAAGTCAGTAAAGAGCGATACATGACTTAAAGAGAGATCCTGAAAGAGAAATCCGAGTGTGTTGCTGTACATGGCACCTTCGTTGGATGCAA    | 280  |
| P1-CHS1 | GGCAAGACATGGTGTGTGGAGGTACCAAGTTGGGAAAAGAGGCTGCAACTAAGGCAATCAAGGAATGGGGTCAACCAAGTCCAAGATTACCATCTCATCTTTGACCACTAGTGGTGTGACATGCGTGGTGT       | 420  |
| P2-CHS1 | GGCAAGACATGGTGTGTGGAGGTACCAAGTTGGGAAAAGAGGCTGCAACTAAGGCAATCAAGGAATGGGGTCAACCAAGTCCAAGATTACCATCTCATCTTTGACCACTAGTGGTGTGACATGCGTGGTGT       | 420  |
| P3-CHS1 | GGCAAGACATGGTGTGTGGAGGTACCAAGTTGGGAAAAGAGGCTGCAACTAAGGCAATCAAGGAATGGGGTCAACCAAGTCCAAGATTACCATCTCATCTTTGACCACTAGTGGTGTGACATGCGTGGTGT       | 420  |
| P1-CHS1 | GATTATCAGCTCACTAAACTATTAGGCTTCGCCCTCCGTCAGGCTTACATGATGTACCAACAAGGCTGCTTTGGTGTGGCACGGTCTCGTTTGGCCAAAGACCTCTCTGAAAACAACAGGGTGTCTCGGTGT      | 560  |
| P2-CHS1 | GATTATCAGCTCACTAAACTATTAGGCTTCGCCCTCCGTCAGGCTTACATGATGTACCAACAAGGCTGCTTTGGTGTGGCACGGTCTCGTTTGGCCAAAGACCTCTCTGAAAACAACAGGGTGTCTCGGTGT      | 560  |
| P3-CHS1 | GATTATCAGCTCACTAAACTATTAGGCTTCGCCCTCCGTCAGGCTTACATGATGTACCAACAAGGCTGCTTTGGTGTGGCACGGTCTCGTTTGGCCAAAGACCTCTCTGAAAACAACAGGGTGTCTCGGTGT      | 560  |
| P1-CHS1 | TGCTGTTGTTCTGAGATCACCAGTACACATTTCGGGCCCCAAGTACACCCATCTGATAGCTTTGGGTCAAGCTTTGTTGGAGATGTTGACAGCGCTGTCTATTGATGATCAGACCCCTTACCAGTTGAAAAG      | 700  |
| P2-CHS1 | TGCTGTTGTTCTGAGATCACCAGTACACATTTCGGGCCCCAAGTACACCCATCTGATAGCTTTGGGTCAAGCTTTGTTGGAGATGTTGACAGCGCTGTCTATTGATGATCAGACCCCTTACCAGTTGAAAAG      | 700  |
| P3-CHS1 | TGCTGTTGTTCTGAGATCACCAGTACACATTTCGGGCCCCAAGTACACCCATCTGATAGCTTTGGGTCAAGCTTTGTTGGAGATGTTGACAGCGCTGTCTATTGATGATCAGACCCCTTACCAGTTGAAAAG      | 700  |
| P1-CHS1 | CTTTGTTTTCAGCTGTCTGGACTGCCAGACATCTTCCAGACAGTGAAGGGCTATTGATGACACCTTCGCGAAGTTGGTCTCATTTCATCTCCTCAAGGATGTTCTGGACTCATCTCCAAGAAATATTGAGAAG     | 840  |
| P2-CHS1 | CTTTGTTTTCAGCTGTCTGGACTGCCAGACATCTTCCAGACAGTGAAGGGCTATTGATGACACCTTCGCGAAGTTGGTCTCATTTCATCTCCTCAAGGATGTTCTGGACTCATCTCCAAGAAATATTGAGAAG     | 840  |
| P3-CHS1 | CTTTGTTTTCAGCTGTCTGGACTGCCAGACATCTTCCAGACAGTGAAGGGCTATTGATGACACCTTCGCGAAGTTGGTCTCATTTCATCTCCTCAAGGATGTTCTGGACTCATCTCCAAGAAATATTGAGAAG     | 840  |
| P1-CHS1 | GCCTTGGTTGAAGCTTCCAAACCTTGGGAATCTCGGATTAACAATCTATCTTGGATTGCAACCCCTGGTGGACCCCAATTTGGACCAAGTTGAGGCTAAGTTAGGCTGAAGCTGAAAAATGGAAGTACTAG       | 980  |
| P2-CHS1 | GCCTTGGTTGAAGCTTCCAAACCTTGGGAATCTCGGATTAACAATCTATCTTGGATTGCAACCCCTGGTGGACCCCAATTTGGACCAAGTTGAGGCTAAGTTAGGCTGAAGCTGAAAAATGGAAGTACTAG       | 980  |
| P3-CHS1 | GCCTTGGTTGAAGCTTCCAAACCTTGGGAATCTCGGATTAACAATCTATCTTGGATTGCAACCCCTGGTGGACCCCAATTTGGACCAAGTTGAGGCTAAGTTAGGCTGAAGCTGAAAAATGGAAGTACTAG       | 980  |
| P1-CHS1 | ACATGTGCTCAGCGAGTATGTAACATGTCAAGTGCATGGCTGCTATTATCTTGGATCAAAATGAGGAAGAAATCAATAGAAAATGGACTTGGCACAACCGGTGAAGGCTTGTGCTGGGTGTGCTATTGGTTTGGGCT | 1120 |
| P2-CHS1 | ACATGTGCTCAGCGAGTATGTAACATGTCAAGTGCATGGCTGCTATTATCTTGGATCAAAATGAGGAAGAAATCAATAGAAAATGGACTTGGCACAACCGGTGAAGGCTTGTGCTGGGTGTGCTATTGGTTTGGGCT | 1120 |
| P3-CHS1 | ACATGTGCTCAGCGAGTATGTAACATGTCAAGTGCATGGCTGCTATTATCTTGGATCAAAATGAGGAAGAAATCAATAGAAAATGGACTTGGCACAACCGGTGAAGGCTTGTGCTGGGTGTGCTATTGGTTTGGGCT | 1120 |
| P1-CHS1 | CTGGACTCACCGTTGAGACTGTGTGCTCCGAGTGTCACTCTCTGA                                                                                             | 1167 |
| P2-CHS1 | CTGGACTCACCGTTGAGACTGTGTGCTCCGAGTGTCACTCTCTGA                                                                                             | 1167 |
| P3-CHS1 | CTGGACTCACCGTTGAGACTGTGTGCTCCGAGTGTCACTCTCTGA                                                                                             | 1167 |

B

|         |                                                                                                                                        |     |
|---------|----------------------------------------------------------------------------------------------------------------------------------------|-----|
| P1-CHS1 | MVSEIRKAQRAEGPATVMAIGTATPPNCVDQSTYPDYFRITNSEHMTLKEKFKRMCDKSMIKRMYLNEEILKENPVCAYMAPSLDARQDMVVEVPKLGKEAATKAKEWGQPKSKIHLIFCTTSGVDMPGA     | 140 |
| P2-CHS1 | MVSEIRKAQRAEGPATVMAIGTATPPNCVDQSTYPDYFRITNSEHMTLKEKFKRMCDKSMIKRMYLNEEILKENPVCAYMAPSLDARQDMVVEVPKLGKEAATKAKEWGQPKSKIHLIFCTTSGVDMPGA     | 140 |
| P3-CHS1 | MVSEIRKAQRAEGPATVMAIGTATPPNCVDQSTYPDYFRITNSEHMTLKEKFKRMCDKSMIKRMYLNEEILKENPVCAYMAPSLDARQDMVVEVPKLGKEAATKAKEWGQPKSKIHLIFCTTSGVDMPGA     | 140 |
| P1-CHS1 | DYQLTKLLGLRPSVKRYMMQGGCFAGTVLRLAKDLAENKAGARVLVVCSEITAVTFRPTDTHLDSLVQALFGDGAAGVIVGSDPLPVEKPLFQLVWTAQTLIPDSEAGIDGHLREVGLTHLLKDVPLISKNIEX | 280 |
| P2-CHS1 | DYQLTKLLGLRPSVKRYMMQGGCFAGTVLRLAKDLAENKAGARVLVVCSEITAVTFRPTDTHLDSLVQALFGDGAAGVIVGSDPLPVEKPLFQLVWTAQTLIPDSEAGIDGHLREVGLTHLLKDVPLISKNIEX | 280 |
| P3-CHS1 | DYQLTKLLGLRPSVKRYMMQGGCFAGTVLRLAKDLAENKAGARVLVVCSEITAVTFRPTDTHLDSLVQALFGDGAAGVIVGSDPLPVEKPLFQLVWTAQTLIPDSEAGIDGHLREVGLTHLLKDVPLISKNIEX | 280 |
| P1-CHS1 | ALVEAFQPLGIDSYNSIFWIAHPGGPAILDQVEARKLGLPEKMEATRHVLSEYGMSSACVFLILDQMRKKSIEGLGTTGEGLDWGLFQFGPGLTVETVLRSVTL                               | 388 |
| P2-CHS1 | ALVEAFQPLGIDSYNSIFWIAHPGGPAILDQVEARKLGLPEKMEATRHVLSEYGMSSACVFLILDQMRKKSIEGLGTTGEGLDWGLFQFGPGLTVETVLRSVTL                               | 388 |
| P3-CHS1 | ALVEAFQPLGIDSYNSIFWIAHPGGPAILDQVEARKLGLPEKMEATRHVLSEYGMSSACVFLILDQMRKKSIEGLGTTGEGLDWGLFQFGPGLTVETVLRSVTL                               | 388 |

C

|         |                                                                                                                                            |     |
|---------|--------------------------------------------------------------------------------------------------------------------------------------------|-----|
| P1-CHS3 | ATGGTCAGTGTGAAGAGATCCGTAATGCACAACGTCAGAGGGCCCTGCCACTGTCATGGCTATTGGCACGCGCACTCTCCAAACTGTGTCGATCAGAGTAACCTATCTGACTATTATTCCCGATCACCACACGGA    | 140 |
| P2-CHS3 | ATGGTCAGTGTGAAGAGATCCGTAATGCACAACGTCAGAGGGCCCTGCCACTGTCATGGCTATTGGCACGCGCACTCTCCAAACTGTGTCGATCAGAGTAACCTATCTGACTATTATTCCCGATCACCACACGGA    | 140 |
| P3-CHS3 | ATGGTCAGTGTGAAGAGATCCGTAATGCACAACGTCAGAGGGCCCTGCCACTGTCATGGCTATTGGCACGCGCACTCTCCAAACTGTGTCGATCAGAGTAACCTATCTGACTATTATTCCCGATCACCACACGGA    | 140 |
| P1-CHS3 | GCACATGACCGAGCTCAAAGAAAAATTCAAGCGCATGTGTGATAAGTCAATGATTAAAGAGCGATACATGACTTAAAGAGAGATCCTGAAAGAGAAATCCGAGTGTGTTGCTGTACATGGCACCTTCGTTGGATGCAA | 280 |
| P2-CHS3 | GCACATGACCGAGCTCAAAGAAAAATTCAAGCGCATGTGTGATAAGTCAATGATTAAAGAGCGATACATGACTTAAAGAGAGATCCTGAAAGAGAAATCCGAGTGTGTTGCTGTACATGGCACCTTCGTTGGATGCAA | 280 |
| P3-CHS3 | GCACATGACCGAGCTCAAAGAAAAATTCAAGCGCATGTGTGATAAGTCAATGATTAAAGAGCGATACATGACTTAAAGAGAGATCCTGAAAGAGAAATCCGAGTGTGTTGCTGTACATGGCACCTTCGTTGGATGCAA | 280 |
| P1-CHS3 | GGCAAGACATGGTGTGTGGAGGTACCAAGTTGGGAAAAGAGGCTGCAACTAAGGCAATCAAGGAATGGGGTCAACCAAGTCCAAGATTACCATCTCATCTTTGACCACTAGTGGTGTGACATGCGTGGTGT        | 420 |
| P2-CHS3 | GGCAAGACATGGTGTGTGGAGGTACCAAGTTGGGAAAAGAGGCTGCAACTAAGGCAATCAAGGAATGGGGTCAACCAAGTCCAAGATTACCATCTCATCTTTGACCACTAGTGGTGTGACATGCGTGGTGT        | 420 |
| P3-CHS3 | GGCAAGACATGGTGTGTGGAGGTACCAAGTTGGGAAAAGAGGCTGCAACTAAGGCAATCAAGGAATGGGGTCAACCAAGTCCAAGATTACCATCTCATCTTTGACCACTAGTGGTGTGACATGCGTGGTGT        | 420 |
| P1-CHS3 | GATTATCAGCTCACTAAACTATTAGGCTTCGCCCTCCGTCAGGCTTACATGATGTACCAACAAGGCTGCTTTGGTGTGGCACGGTCTCGTTTGGCCAAAGACCTCTCTGAAAACAACAGGGTGTCTCGGTGT       | 560 |
| P2-CHS3 | GATTATCAGCTCACTAAACTATTAGGCTTCGCCCTCCGTCAGGCTTACATGATGTACCAACAAGGCTGCTTTGGTGTGGCACGGTCTCGTTTGGCCAAAGACCTCTCTGAAAACAACAGGGTGTCTCGGTGT       | 560 |

**Supplementary Fig. S1. Multiple sequence alignment describing the base sequence and amino acids sequence of *CHS1*, *CHS3* and *CHS4* in P1(P1342618B), P2(NN86-4) and P3(NN493-1). (A),(C),(E) represent multiple base sequence alignment of *CHS1*, *CHS3* and *CHS4*. (B),(D),(F) represent multiple amino acids sequence alignment of *CHS1*, *CHS3* and *CHS4*.**

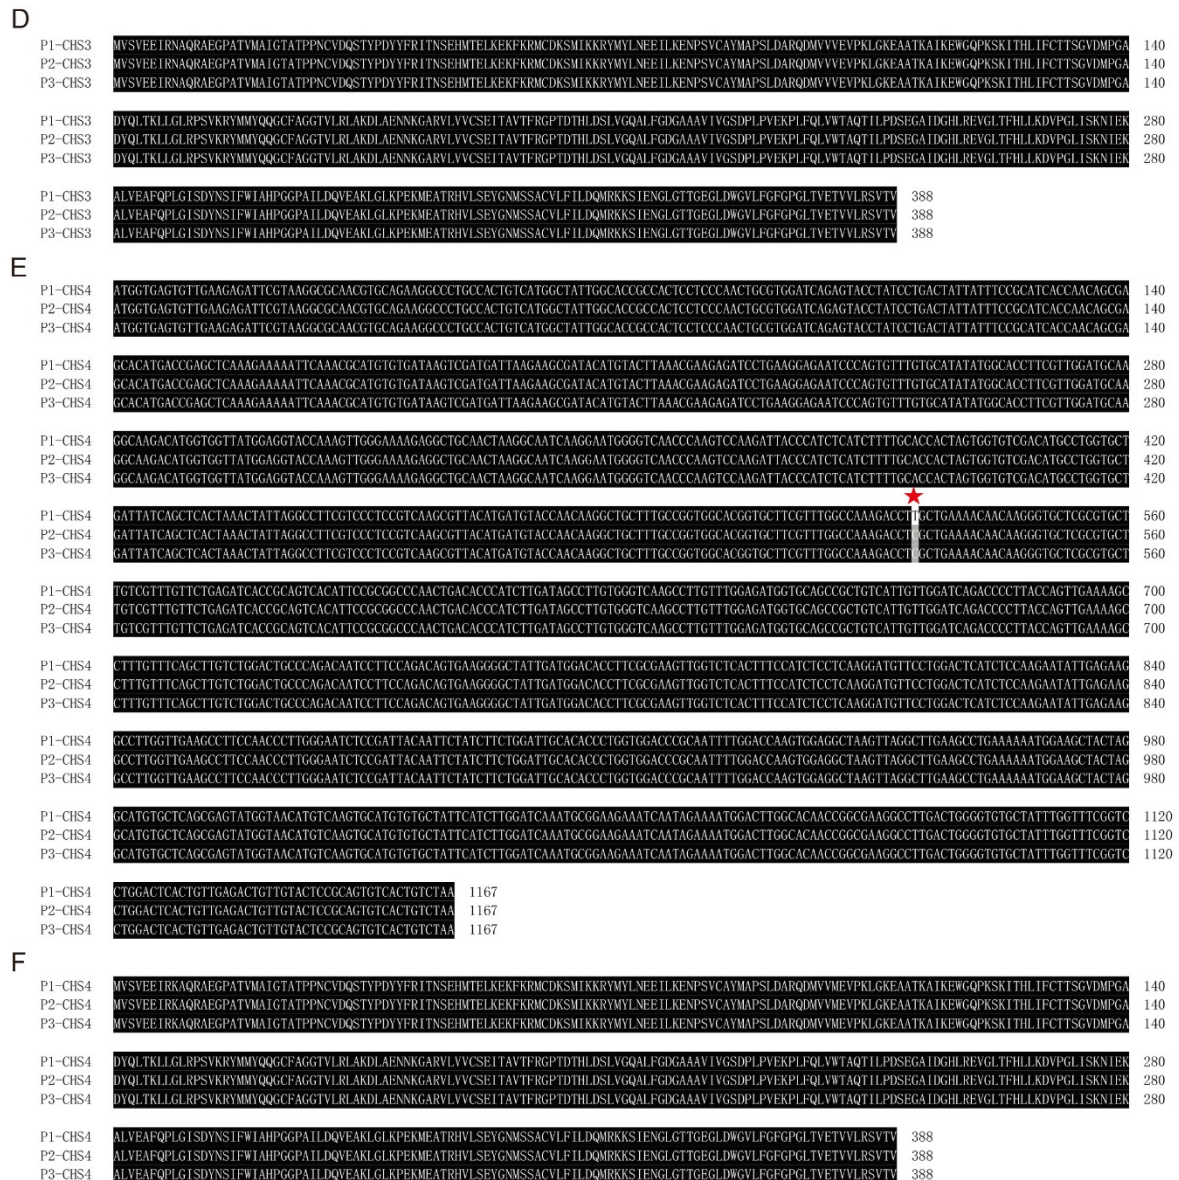

**Supplementary Fig. S1. Multiple sequence alignment describing the base sequence and amino acids sequence of *CHS1*, *CHS3* and *CHS4* in P1(PI342618B), P2(NN86-4) and P3(NN493-1). (A),(C),(E) represent multiple base sequence alignment of *CHS1*, *CHS3* and *CHS4*. (B),(D),(F) represent multiple amino acids sequence alignment of *CHS1*, *CHS3* and *CHS4*.**



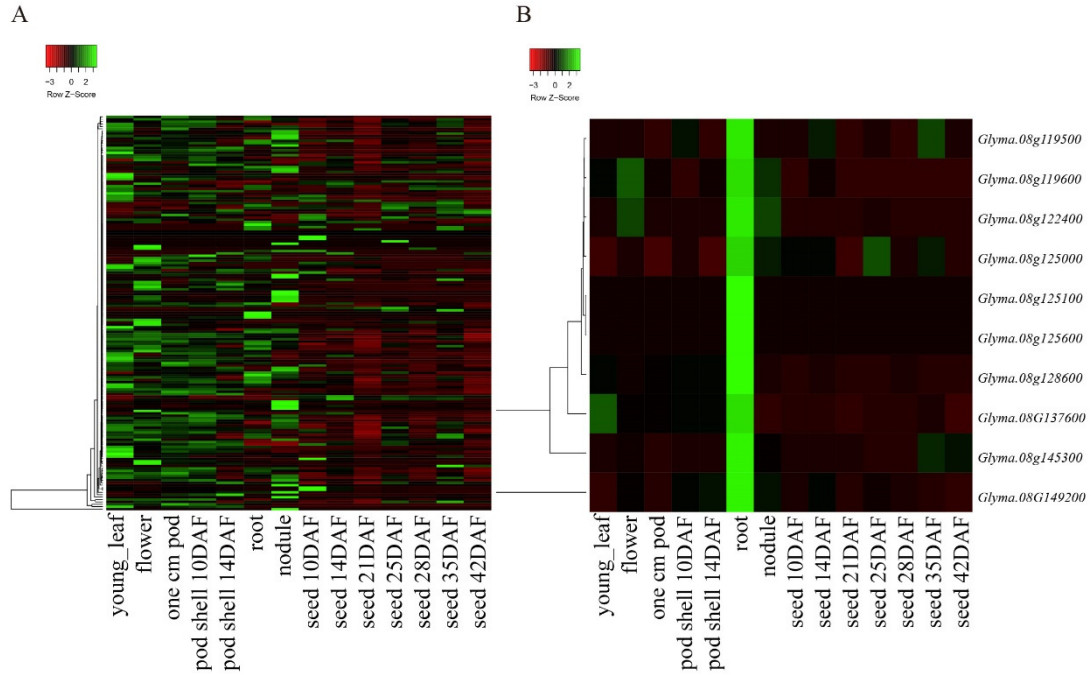

**Supplementary Fig. S2. Expression analysis of candidate genes in the QTL hotspot(8-2) region related to seed-flooding tolerance.** (A) Heat maps of expression levels for 164 candidate genes in different soybean tissues. (B) Heat maps of expression levels for 10 screened candidate genes associated with seed-flooding tolerance in different tissues. The RNA-seq data were obtained from Soybase (<https://www.soybase.org/soyseq/>).



|                     |                                                                                                                                         |     |
|---------------------|-----------------------------------------------------------------------------------------------------------------------------------------|-----|
| P1-Glyma. 08g122400 | ATGAATCTACAGACCTGGACCTGATATATCTCTTATGTCTTTCTTTGGTTCAGGCTTGGAAACACCAAAATATTAAATAATGGCAAAAACAGGAATCTCTCATATGGGAATTTGGGTACTCAATTACATAT     | 139 |
| P2-Glyma. 08g122400 | ATGAATGCTAGAGACCTGGACCTGATATATCTCTTATGTCTTTCTTTGGTTCAGGCTTGGAAACACCAAAATATTAAATAATGGCAAAAACAGGAATCTCTCATATGGGAATTTGGGTACTCAATTACATAT    | 140 |
| P3-Glyma. 08g122400 | ATGAATGCTAGAGACCTGGACCTGATATATCTCTTATGTCTTTCTTTGGTTCAGGCTTGGAAACACCAAAATATTAAATAATGGCAAAAACAGGAATCTCTCATATGGGAATTTGGGTACTCAATTACATAT    | 140 |
| P1-Glyma. 08g122400 | TGTTCTCTATGCTCAATCCCAACACTCTCTGACACAGGAAATCCATATATGGGAAACCTAACATTTCTCTAAACACCTTGACACATTCAGGCGCAAGCCCAACACCAACCAATCCAAACACCCCAACCAAGGCCA | 279 |
| P2-Glyma. 08g122400 | TGTTCTCTATGCTCAATCCCAACACTCTCTGACACAGGAAATCCATATATGGGAAACCTAACATTTCTCTAAACACCTTGACACATTCAGGCGCAAGCCCAACACCAACCAATCCAAACACCCCAACCAAGGCCA | 280 |
| P3-Glyma. 08g122400 | TGTTCTCTATGCTCAATCCCAACACTCTCTGACACAGGAAATCCATATATGGGAAACCTAACATTTCTCTAAACACCTTGACACATTCAGGCGCAAGCCCAACACCAACCAATCCAAACACCCCAACCAAGGCCA | 280 |
| P1-Glyma. 08g122400 | CACCCCAACTACACACCAACACCCCACTACTACATCTCCAGTATGCTCAATGTGTGTTGCTTAACCGAGAGCTTGACACATGCTCTACAGGTTGCTCTTGACTATGCTTGTGGGTTGGAGGTGCAGACTGCTCA  | 419 |
| P2-Glyma. 08g122400 | CACCCCAACTACACACCAACACCCCACTACTACATCTCCAGTATGCTCAATGTGTGTTGCTTAACCGAGAGCTTGACACATGCTCTACAGGTTGCTCTTGACTATGCTTGTGGGTTGGAGGTGCAGACTGCTCA  | 420 |
| P3-Glyma. 08g122400 | CACCCCAACTACACACCAACACCCCACTACTACATCTCCAGTATGCTCAATGTGTGTTGCTTAACCGAGAGCTTGACACATGCTCTACAGGTTGCTCTTGACTATGCTTGTGGGTTGGAGGTGCAGACTGCTCA  | 420 |
| P1-Glyma. 08g122400 | GCAATACAAACAGGAGCAAGCTGTTATATCTCAACACTGTCGGCAGATGCTCTTATGCAATCAATGACTACTACCAAGAAATCCAGACCTACACGCTTGATATTGGAGGAACAGCATCTCTTACAAGCAATGA   | 559 |
| P2-Glyma. 08g122400 | GCAATACAAACAGGAGCAAGCTGTTATATCTCAACACTGTCGGCAGATGCTCTTATGCAATCAATGACTACTACCAAGAAATCCAGACCTACACGCTTGATATTGGAGGAACAGCATCTCTTACAAGCAATGA   | 560 |
| P3-Glyma. 08g122400 | GCAATACAAACAGGAGCAAGCTGTTATATCTCAACACTGTCGGCAGATGCTCTTATGCAATCAATGACTACTACCAAGAAATCCAGACCTACACGCTTGATATTGGAGGAACAGCATCTCTTACAAGCAATGA   | 560 |
| P1-Glyma. 08g122400 | TCCAAGTAGTGGGATTTGCAAAATACGATACCCAGTACCAAGCAATCAAGCCACCAACACCAAAATTTGTACGCCACCAAGTCCACAACTCCAGTAGTATGCCCACTTCCACAGCAATGCTAAATCTCTG      | 699 |
| P2-Glyma. 08g122400 | TCCAAGTAGTGGGATTTGCAAAATACGATACCCAGTACCAAGCAATCAAGCCACCAACACCAAAATTTGTACGCCACCAAGTCCACAACTCCAGTAGTATGCCCACTTCCACAGCAATGCTAAATCTCTG      | 700 |
| P3-Glyma. 08g122400 | TCCAAGTAGTGGGATTTGCAAAATACGATACCCAGTACCAAGCAATCAAGCCACCAACACCAAAATTTGTACGCCACCAAGTCCACAACTCCAGTAGTATGCCCACTTCCACAGCAATGCTAAATCTCTG      | 700 |
| P1-Glyma. 08g122400 | GTGGCGGATCAACTGTTTGTGTCAGAACCAACAGGAGGCCAACACAGCCATTTGCAATTAATTCCTGCTGATGTGTGTACATGTGGTCTGTGGCTTCCTTCAACTAGCAAAATACACTAG                | 830 |
| P2-Glyma. 08g122400 | GTGGCGGATCAACTGTTTGTGTCAGAACCAACAGGAGGCCAACACAGCCATTTGCAATTAATTCCTGCTGATGTGTGTACATGTGGTCTGTGGCTTCCTTCAACTAGCAAAATACACTAG                | 831 |
| P3-Glyma. 08g122400 | GTGGCGGATCAACTGTTTGTGTCAGAACCAACAGGAGGCCAACACAGCCATTTGCAATTAATTCCTGCTGATGTGTGTACATGTGGTCTGTGGCTTCCTTCAACTAGCAAAATACACTAG                | 831 |

|                    |                                                                                                                               |     |
|--------------------|-------------------------------------------------------------------------------------------------------------------------------|-----|
| P1-Glyma. 08612240 | MNARSWHVLFSLCLFFSGSLGKTKILLKNGKKEIFSSSELGTQLDVPINVTPTDGNVGNPNAPQPTDSGNPTPTTNNPTPTPTPTPTPTPTPTSSGGQWCVANGASDIALQVADYACGFGGADS  | 140 |
| P2-Glyma. 08612240 | MNARSWHVLFSLCLFFSGSLGKTKILLKNGKKEIFSSSELGTQLDVPINVTPTDGNVGNPNAPQPTDSGNPTPTTNNPTPTPTPTPTPTPTPTSSGGQWCVANGASDIALQVADYACGFGGADS  | 140 |
| P3-Glyma. 08612240 | MNARSWHVLFSLCLFFSGSLGKTKILLKNGKKEIFSSSELGTQLDVPINVTPTDGNVGNPNAPQPTDSGNPTPTTNNPTPTPTPTPTPTPTPTSSGGQWCVANGASDIALQVADYACGFGGADS  | 140 |
| P1-Glyma. 08612240 | AIQPGASCYNPTVRDHASAFYNDYQKNPAPTSVCFGGTASLTNSDPSSGSKYASPKSTNGNMPNPTFVSPSPPTVMITPTPDLMLNGGGSVTFGSEPTGSPNTATFANSLMLFTGGLASLQIANT | 276 |
| P2-Glyma. 08612240 | AIQPGASCYNPTVRDHASAFYNDYQKNPAPTSVCFGGTASLTNSDPSSGSKYASPKSTNGNMPNPTFVSPSPPTVMITPTPDLMLNGGGSVTFGSEPTGSPNTATFANSLMLFTGGLASLQIANT | 276 |
| P3-Glyma. 08612240 | AIQPGASCYNPTVRDHASAFYNDYQKNPAPTSVCFGGTASLTNSDPSSGSKYASPKSTNGNMPNPTFVSPSPPTVMITPTPDLMLNGGGSVTFGSEPTGSPNTATFANSLMLFTGGLASLQIANT | 276 |

**Supplementary Fig. S3. Multiple sequence alignment describing the base sequence and amino acids sequence of *Glyma.08G122400* in P1(PI342618B), P2(NN86-4) and P3(NN493-1).** (A) represent multiple base sequence alignment of *Glyma.08G124400*. (B) represent multiple amino acids sequence alignment of *Glyma.08G124400*.
